# Supplementary material
Source: Research Square preprint supplement (doi:10.21203/rs.3.rs-9932408/v1)
Supplement: Supplementary file 1 [file 462139da95971f35bf275e8f.docx]

| **Scenario** | **Departaments** | **Municipalities** |
| --- | --- | --- |
| Caribe | Bolívar, Magdalena y La Guajira | Córdoba, Zambrano, El Carmen De Bolívar, San Jacinto, María La Baja, San Onofre, Dibulla, Santa Marta, Riohacha |
| Chocó-Magdalena medio | Chocó, Antioquia, Córdoba, Bolívar, Sucre, Santander, Boyacá y Cundinamarca | Nariño, Argelia, Sonsón, San Francisco, Cocorná, San Luis, Puerto Boyacá, Bolívar, Puerto Nare, San Carlos, San Rafael, Cimitarra, El Carmen, Simacota, Angostura, San Vicente De Chucurí, Campamento, Yarumal, Barrancabermeja, Briceño, Remedios, Yondó, Amalfi, Cantagallo, Valdivia, Anorí, Segovia, Ituango, San Pablo, Tarazá, Chigorodó, Carepa, San José De Uré, Cáceres, El Bagre, Puerto Libertador, Apartadó, Caucasia, Puerto Wilches, Santa Rosa Del Sur, Simití, Montelíbano, Nechí, Tierralta, San Jacinto Del Cauca, Achí, Unguía, Dabeiba, Mutatá, Turbo, Riosucio, Nuevo Belen de Bajira, Carmen Del Darién, Valencia, San Pedro De Urabá, Necoclí, Arboletes, Zaragoza |
| Catatumbo- Arauca | Arauca, Norte de Santander | Tame, Fortul, Arauquita, Saravena, El Zulia, Hacarí, Sardinata, San Calixto, El Tarra, San José de Cúcuta, Tibú, Teorama, Convención, El Carmen, Ábrego, Convención, Puerto Rondón |
| Amazonía-Meta | Caquetá, Cauca, Guaviare, Meta, Nariño y Putumayo | Puerto Caicedo, Orito, Solita, Puerto Guzmán, Villagarzón, Curillo, Solano, Valparaíso, Milán, Albania, Mocoa, Cartagena Del Chairá, San José Del Fragua, Piamonte, Belén De Los Andaquíes, La Montañita, Miraflores, Calamar, Florencia, El Paujil, El Doncello, El Retorno, Puerto Rico, La Macarena, San Vicente Del Caguán, Vistahermosa, Puerto Lleras, San Juan De Arama, Mesetas, Uribe, San Martín, San Carlos De Guaroa, Acacías, Villavicencio, Puerto López, Puerto Gaitán, San Miguel, Valle Del Guamuez, Puerto Asís, Puerto Leguízamo, Ipiales, San José Del Guaviare, Puerto Concordia, Puerto Rico, Mapiripán, |
| Cauca-Nariño | Cauca-Nariño | Samaniego, La Llanada, Los Andes, Policarpa, Cumbitara, El Rosario, Magüí, Leiva, Balboa, Roberto Payán, Patía, Argelia, Olaya Herrera, Santa Bárbara, El Charco, San Andrés de Tumaco, Barbacoas |
