# Supplementary material
Source: Research Square preprint supplement (doi:10.21203/rs.3.rs-9932408/v1)
Supplement: Supplementary file 2 [file db0e46ef75bde04d7dc568f3.docx]

**Conflicto armado como disturbio socioecológico: escenarios prioritarios para la restauración ecológica en Colombia a través de lógica difusa**

**Resumen**

El conflicto armado en Colombia ha operado históricamente como un disturbio socioecológico que ha transformado las coberturas terrestres y degradado ecosistemas. La restauración ecológica (RE) de estos territorios representa una oportunidad en el marco del Acuerdo de Paz, pero exige herramientas de priorización que incorporen la incertidumbre inherente a las dinámicas del conflicto. Este estudio desarrolla un modelo de priorización de áreas para la RE en Colombia mediante lógica difusa, integrando variables asociadas al conflicto armado, biofísicas, socioeconómicas en un sistema de inferencia difusa jerárquico (HFIS) integrado a un Sistema de Información Geográfica. El modelo generó cinco escenarios de priorización diferenciados por las dinámicas del conflicto: Caribe, Chocó-Magdalena Medio, Catatumbo-Arauca, Amazonía-Meta y Nariño-Cauca. Los resultados revelan que las áreas protegidas y los territorios colectivos han funcionado como refugios ecológicos en zonas de alta intensidad del conflicto, siendo claves para implementar procesos de RE. La coincidencia espacial entre los escenarios priorizados y los municipios de los Programas de Desarrollo con Enfoque Territorial (PDET) sustenta la coherencia del modelo con los instrumentos de política pública del posconflicto. Para cada escenario se identificaron estrategias de RE diferenciadas articuladas con instrumentos de política vigentes, reconociendo el desminado como proceso transversal que debe avanzar articulado con la RE. Los hallazgos evidencian que la RE en territorios afectados por el conflicto requiere un enfoque territorial diferenciado que reconozca la heterogeneidad de los disturbios socioecológicos y se integre a los procesos de reparación y reconstrucción territorial del posconflicto colombiano.

**Palabras clave:** Paisajes posconflicto, Resiliencia socioecológica, Degradación ecosistémica, Priorización territorial, Acuerdo de paz

**INTRODUCCIÓN**

Los conflictos armados en el mundo han generado una significativa pérdida de bosques y transformación en el uso del suelo (Dorondel et al., 2021; Lavaux Stéphanie, 2004; Pérez-Roncón et al., 2022) especialmente en biomas tropicales (Méndez y Valánszki, 2020) en África, America Latina y Asia (Ghosh & Ramesh, 2020). La degradación ambiental en estos contextos se relaciona con la explotación histórica de recursos, exclusión social y el uso de bienes de la naturaleza para financiar actividades de grupos beligerantes (Lebillon, 2002). En Colombia, el inicio del conflicto armado interno (CAI) data sus inicios en la década de los años sesenta, hasta el 2016 con la firma del acuerdo de paz con la guerrilla de las Fuerzas Armadas Revolucionarias de Colombia Ejercito del pueblo (FARC-EP) (Centro Nacional de Memoria Histórica [CNMH], 2014), por lo que el periodo posterior a esto se le ha denominado posconflicto.

El CAI ha operado como un disturbio socioecológico generando diversos cambios en las coberturas (Armenteras et al., 2019; 2013; Negret, 2020). Esto se ha agudizado por su larga duración, su vínculo con al acceso inequitativo a la tierra y a políticas que privilegian el modelo económico basado en la explotación del capital natural (Castro-Núñez et al., 2017; Ruiz-Serna & Ojeda Ojeda, 2023). Además, la consecuente pérdida de biodiversidad compromete las bases ecológicas que han sostenido los modos de vida, las prácticas culturales y las economías locales comunitarias (Grima & Singh, 2019). El despojo ha producido escenarios socioecológicos deteriorados, principalmente por la pérdida o daño de los servicios ecosistémicos y las limitaciones que enfrentan las comunidades para ejercer la gobernanza en sus territorios (Pérez-Rincón et al., 2022; Almassi, 2017).

Esto es relevante, pues en el posconflicto se abrió una ventana de oportunidad, para que inversores y otros grupos armados, tomaran el control territorial, y llevaran a cabo actividades extractivas en las zonas antes dominadas por las FARC-EP, aumentando la deforestación en el país (Prem et al., 2020; Rodríguez et al., 2017). Murillo-Sandoval et al. (2021) encontraron que en este periodo se presentó una vasta ola de expansión agrícola lo que aumento este fenómeno en un 40%. Del mismo modo, Clerici et al. (2020) describe un aumento dramático y significativo en las áreas protegidas del país. De manera contradictoria, algunas dinámicas del conflicto han tenido efectos en la conservación de ciertas áreas, con la necesidad de mantener amplias coberturas boscosas para tapar rutas de tráfico o escondites (Benavides-Ossa et al., 2022; Rodríguez et al., 2017). En este sentido, aunque el posconflicto inicia con el acuerdo de paz, la guerra no ha terminado, se ha transformado por la génesis de nuevos actores armados, que generan reconfiguraciones territoriales con mercados de violencia, disputas por economías ilícitas y nuevas coaliciones armadas (Badrán, 2023).

En este contexto, en el mundo ya se ha usado la restauración ecológica (RE) en entornos de posconflicto, con iniciativas que incluyen la participación de fuerzas militares en la salvaguarda de áreas protegidas (Ghosh & Ramesh, 2023; Machlis & Hanson, 2008), e implementado acciones de restauración en antiguos enclaves militares (Nail, 2018; Machlis & Hanson, 2008). Sin embargo, se ha evidenciado el fracaso en algunos de estos procesos por la falta de inclusión de las comunidades, carencia de planificación estratégica y poca participación estatal (Ghosh & Ramesh, 2023; Dorondel et al., 2021).

En Colombia, se ha destacado la necesidad de crear estrategias legales para restaurar y reparar los impactos ambientales del CAI (Pérez-Rincón et al., 2022) Además, recientemente la RE se ha incorporado en políticas para la construcción de paz. Ejemplo de ello es su inclusión en sentencias de restitución de derechos territoriales para comunidades étnicas, reparación colectiva a víctimas del CAI, justicia restaurativa, proyectos de las Fuerzas Armadas de Colombia y jurisprudencia que posibilita el servicio social para la paz (Unidad de Restitución de Tierras, 2024; Jurisdicción Especial para la Paz [JEP], 2024; Molina-Orjuela et al., 2022; Congreso de la República, 2022).

Esto cobra relevancia pues se ha evidenciado que los programas de RE pueden resultar muy costosos (Andres et al., 2024) y en territorios con alta conflictividad pueden ser inviables por temas de seguridad (Bruch et al., 2023). Por lo que los modelos de priorización pueden ayudar a enfocar mejor los recursos (Méndez-Toribio et al. 2017) y encaminar los procesos de restauración incluyendo en el diagnostico lecturas socioambientales del conflicto (Bruch et al., 2023), de manera que no solo se recuperen los ecosistemas degradados, sino que se aporte al bienestar humano (Nelson et al, 2024).

Además, una proporción significativa de los estudios sobre priorización de áreas para la restauración, tiene enfoques técnicos que tienden a excluir dimensiones culturales, afectivas y políticas (Teshager & Soromesa, 2025; Castillo-Madujano & Smith Ramírez, 2022) Por lo que en investigaciones como las de Rabelo Costa et al. (2021), Dos Santos et al. (2020), Corderio et al. (2022) y Ocampo Melgar et al. (2016) se recomienda adoptar enfoques más transdisciplinares, superando el enfoque exclusivamente ecológico.

En el caso colombiano, a pesar de los avances de priorización de áreas para la restauración realizadas por el Ministerio de Ambiente y Desarrollo Sostenible (2023) y el Instituto de Investigaciones Alexander von Humboldt en Viña-Piñeros Marcelo et al. (2021), estas no incluyen los impactos de la guerra como disturbio sociocológico, ni como factor de transformación de los ecosistemas, además no tiene en cuenta variables sociales, ni integran la complejidad de más de cinco décadas del CAI, ni de las nuevas dinámicas bélicas del posconflicto.

Por esto, dado el alto nivel de incertidumbre y la complejidad de los sistemas socioecológicos en territorios afectados por el conflicto, el uso de lógica difusa se presenta como una alternativa metodológica pertinente (Adriaenssens et al., 2004). Esta herramienta de inteligencia artificial integrada con el modelamiento espacial se ha consolidado como un enfoque adecuado para modelar fenómenos complejos, especialmente cuando las variables involucradas presentan altos niveles de incertidumbre, imprecisión o variabilidad espacial y temporal (Lawrence, 2025). Su uso es particularmente útil para la RE en escenarios, donde las condiciones ambientales y sociales cambian constantemente o pueden ser ambiguas (Ocampo-Melgar, 2016).

Por ello, el presente trabajo tiene como objetivo, identificar escenarios prioritarios de RE en territorios afectados por el CAI en Colombia, mediante la integración del modelamiento con lógica difusa integrado con Sistemas de Información Geográfica (SIG). Por lo que, la propuesta aborda de manera explícita la incertidumbre inherente de sistemas socioecológicos complejos, a través de un modelo conceptual que articula dimensiones biofísicas y sociales para comprender los impactos del CAI como disturbio. El resultado central, es la identificación de cinco escenarios de priorización que pueden aportar a la formulación de estrategias de RE adaptadas a las condiciones de conflictividad territorial.

**MATERIALES Y METODOS**

**1.Selección de criterios de priorización**

Para la selección de criterios de priorización, primero se realizó una revisión bibliográfica mediante la consulta de bases de datos como Dialnet, ProQuest (Social Science Database y Criminal Justice), Google Scholar, ScienceDirect y Web of Science, orientada a analizar la relación entre la guerra, entendida como disturbio socioecológico, y la RE en contextos de posconflicto. De manera complementaria, se incorporaron fuentes institucionales como sentencias de restitución de derechos territoriales e informes de la JEP, el CNMH y la Comisión de la Verdad, con el fin de contextualizar su dimensión histórica, política y socioambiental en Colombia. Con base en estos insumos, se elaboró una matriz que vinculó cada referencia con sus aportes conceptuales, relacionales y causales, orientada a identificar las consecuencias de la guerra sobre el ambiente y la integración de la restauración en procesos de posguerra y construcción de paz a escala global, regional y nacional (De León-Casillas et al., 2019).

Seguido a esto, a partir de la matriz, se construyó un modelo conceptual para Colombia con base en el modelo de conservación propuesto por Salafsky (2002) (Figura 1), el cual se centra en los *threats and other factors*, considerando el CAI como un factor estructurante de los componentes biofísicos, sociales e institucionales. Asimismo, se definieron los *practitioners*, incluyendo actores armados y no armados involucrados, y las *Actions: Approaches, strategies y tools*, particularmente aquellas derivadas de organizaciones nacionales e internacionales orientadas a la construcción de paz.

Finalmente, con base en este modelo, se seleccionaron diez criterios que, debido a su heterogeneidad y a la necesidad de integrar dimensiones ecológicas y sociales, fueron agrupados mediante un enfoque de categorización temática (Tabla 1). Estos criterios se emplearon como insumo analítico para la evaluación de dinámicas asociadas al CAI en relación con procesos de degradación ambiental y vulnerabilidad social en los territorios.

**2.Modelamiento con lógica difusa**

Para el desarrollo del modelo de lógica difusa se empleó el software MATLAB, construyéndose un Fuzzy Inference System (FIS) independiente para cada categoría, integrando los criterios seleccionados (input) derivados del análisis documental. Cada criterio se representó mediante funciones de membresía de tipo trapezoidal o triangular, definidas según su naturaleza, los rangos identificados en la literatura y la distribución empírica de los datos, lo que permitió reflejar la gradualidad e incertidumbre inherentes a los fenómenos modelados. Los criterios se combinaron en el FIS mediante reglas de inferencia if–then, basadas en la literatura especializada y en la lógica relacional del modelo conceptual, generando salidas orientadas a la identificación de escenarios para la RE en contextos de CAI (Zadeh, 1965; The MathWorks Inc., 2025).

**2.1 Fuzzy Inference System (FIS) por categoría**

**Categoría biofísica.** Los criterios seleccionados capturan el grado de transformación ecosistémica y la susceptibilidad frente al cambio climático como determinantes de la necesidad y factibilidad de la RE (Lim et al., 2022; Nelson, 2024). La transformación ecosistémica se operacionalizó mediante una escala ordinal de coberturas que representa niveles progresivos de modificación antrópica, modelada con funciones trapezoidales y triangulares para representar tanto rangos de pertenencia plena como transiciones graduales entre estados. La vulnerabilidad climática, al derivarse de un índice continuo, se modeló con funciones triangulares que evitan la imposición de umbrales rígidos de clasificación. El output denominado *prioridad biofísica* se estructuró de modo que la concurrencia de alta vulnerabilidad climática y alta transformación ecosistémica produjera niveles elevados de prioridad para la RE (Figura 2; S1).

**Categoría socioeconómica.** Los criterios seleccionados representan factores estructurales del CAI asociados a la degradación ambiental, particularmente la desigualdad en el acceso a la tierra y el despojo territorial (Molina-Orjuela et al., 2022; Ojeda, 2016; CNMH, 2014). La desigualdad se modeló con funciones triangulares que capturan transiciones graduales entre niveles. El despojo se representó con funciones trapezoidales de intervalos no equidistantes, ajustadas a su distribución asimétrica para evitar la subestimación de territorios afectados. Las reglas de inferencia establecen que la concurrencia de altos niveles de ambos criterios incrementa la *prioridad socioeconómica* de intervención (Figura 3; S2).

**Categoría de impactos directos.** Esta categoría captura las consecuencias inmediatas de las acciones bélicas sobre el territorio, las cuales condicionan tanto la urgencia como la viabilidad de los procesos de RE (Machlis & Hanson, 2008). Todos los criterios se modelaron con funciones trapezoidales de intervalos no equidistantes, adecuadas para representar umbrales amplios y distribuciones sesgadas. Para la aspersión con glifosato se adoptó un esquema que excluye la categoría baja, en coherencia con el principio de precaución ante sus impactos acumulativos e inciertos (Corte Constitucional de Colombia, 2021). El criterio de cuerpos en los ríos se modeló igualmente sin categoría baja, reconociendo tanto la gravedad inherente del fenómeno como su probable subregistro (Cerón & Lenguas, 2019). Las reglas de inferencia se estructuraron bajo un principio de acumulación: la concurrencia de mayores niveles de afectación incrementa el output de *afectación directa del conflicto armado* (Figura 4; S3).

**Categoría de impactos indirectos.** Esta categoría representa los mecanismos mediante los cuales el CAI degrada los ecosistemas de forma sostenida a través del control territorial y la financiación de economías de guerra (Pérez-Roncón et al., 2022; Lavaux, 2004; Rodríguez et al., 2017). En el caso colombiano, la deforestación y los cultivos de coca constituyen los principales detonantes de degradación ecosistémica, al tiempo que revelan patrones diferenciados de ocupación territorial y modus operandi por parte de los actores armados opuestos (paramilitares y guerrilleros). El criterio de cultivos de coca se estimó como el porcentaje promedio del área ocupada durante 23 años, calculado según la metodología BIESIMCI de UNODC (2019). Las reglas de inferencia representan efectos acumulativos: la concurrencia de deforestación y cultivos de coca incrementa el nivel de *afectación indirecta del conflicto armado*, identificando territorios con dinámicas persistentes de degradación (Figura 5; S4).

**2.2 Método de defuzzificación**

El modelamiento se realizó mediante el método de inferencia difusa de Mamdani, ampliamente utilizado en la toma de decisiones ambientales por su capacidad para incorporar conocimiento experto a través de reglas lingüísticas interpretables (Mamdani & Assilian, 1975). Este método permite que tanto las entradas como las salidas sean representadas mediante conjuntos difusos, facilitando la agregación de múltiples criterios con distintas unidades y escalas en un índice de priorización coherente. La defuzzificación se realizó mediante el método del centroide, que transforma el conjunto difuso resultante en un valor numérico continuo que representa el grado de prioridad de cada unidad espacial.

**3. Modelamiento espacial e integración SIG**

En la figura 6 se presenta un esquema de la metodología implementada para la articulación de los FIS con los SIG para el modelamiento espacial.

Las capas base obtenidas de fuentes oficiales (Tabla 1) fueron sometidas a un proceso de estandarización espacial para garantizar la homogeneidad de los insumos. Todas las capas vectoriales se reproyectaron al sistema de referencia oficial MAGNA-SIRGAS Origen Nacional (EPSG:9377) y se recortaron al límite oficial de Colombia. Las capas vectoriales se convirtieron a formato raster mediante la herramienta *Polygon to Raster* y las capas raster existentes se remuestrearon con la herramienta *Resample*, fijando en todos los casos un tamaño de celda de 100 m con *Snap Raster* sobre el raster de referencia nacional.

La resolución de 100 m se definió considerando la escala de las fuentes originales y los estándares empleados en análisis espaciales de priorización en Colombia (MADS, 2023). Esta resolución es coherente con la naturaleza gradual y territorial de los impactos del conflicto armado sobre los ecosistemas, cuyo análisis requiere capturar patrones espaciales continuos más que eventos puntuales (Raleigh et al., 2010; Armenteras et al., 2013, 2019; Álvarez, 2003).

A partir de los rasters estandarizados se generó una grilla nacional de puntos con celdas de 100 m mediante *Create Fishnet*, asignando a cada centroide los valores de los criterios con *Extract Multi Values to Points*. Para optimizar la capacidad computacional, el proceso se ejecutó por bloques regionales norte, sur, oriente y occidente. Las tablas resultantes por categoría y región se exportaron como archivos CSV y fueron evaluadas en MATLAB mediante la función *evalfis*, que aplicó cada FIS y generó un índice de priorización continuo entre 0 y 1 para cada punto (MATLAB, 2024).

Los valores de prioridad fueron reimportados a ArcGIS Pro mediante *XY Table to Point* y convertidos a formato raster con *Point to Raster*. Los rasters regionales de cada categoría se integraron en un raster nacional continuo mediante *Mosaic to New Raster*, obteniendo un producto estandarizado de priorización para todo el territorio colombiano por categoría.

**4. Identificación de escenarios mediante sistema de inferencia difusa jerárquico (HFIS)**

Para generar el mapa nacional de priorización se implementó un HFIS (*Hierarchical Fuzzy Inference System*), en el que los índices de priorización biofísica, socioeconómica, de impactos directos e indirectos se integraron como entradas de un sistema de segundo nivel para evaluar la prioridad total de RE (Figura 7). Este enfoque jerárquico reduce la complejidad asociada a sistemas difusos de alta dimensionalidad y ha demostrado su utilidad en decisiones espaciales complejas (Ozzer et al., 2020; Ojha, 2018). Las reglas de inferencia se definieron para identificar áreas donde convergen impactos acumulados del conflicto armado con condiciones biofísicas y socioeconómicas desfavorables, estructurando el output en cinco etiquetas lingüísticas, representadas mediante funciones triangulares (Figura 7; S5).

El resultado fue un raster nacional continuo de priorización que integra las cuatro categorías de análisis para cada celda de 100 m. A partir de este, se delimitaron cinco escenarios mediante un proceso interpretativo basado en los patrones espaciales del modelo, la continuidad geográfica de las áreas priorizadas y las dinámicas del conflicto predominantes en cada territorio.

Figura 7.

**5. Identificación de estrategias de RE por escenario**

La identificación de estrategias de RE y condiciones habilitantes para cada escenario se realizó a partir de dos insumos principales. Por un lado, se analizaron los criterios dominantes resultantes del modelo para cada escenario, identificando las dinámicas del conflicto armado que determinan tanto la urgencia de la intervención ecológica como las restricciones operativas para su implementación. Por otro lado, los hallazgos se contrastaron con los instrumentos de política pública vigentes en Colombia orientados a la atención de territorios afectados por el CAI, incluyendo los Programas de Desarrollo con Enfoque Territorial (PDET), la Estrategia Nacional de Restauración Ecológica (MADS, 2015), el Programa Nacional Integral de Sustitución de Cultivos Ilícitos (PNIS) y el programa de desminado humanitario. Este contraste permitió identificar los mecanismos institucionales disponibles para cada escenario y las condiciones habilitantes que deben resolverse previamente a cualquier intervención ecológica.

**RESULTADOS**

**1. Escenarios prioritarios**

Los resultados de los escenarios muestran la distribución de las áreas priorizadas para RE, resumida en el S6 con el número de municipios y departamentos, proporcionando un marco para la descripción detallada de cada escenario.

**1.1 Escenario Caribe**

El escenario Caribe se caracteriza por la confluencia de impactos indirectos del conflicto armado y condiciones socioeconómicas estructurales como principales determinantes de la priorización. Comprende nueve municipios de los departamentos de Bolívar, Magdalena y La Guajira, siendo El Carmen de Bolívar, Zambrano, Santa Marta y Dibulla los de mayor priorización.

Las condiciones biofísicas muestran vulnerabilidad climática baja a media y predominio de agroecosistemas, vegetación secundaria y relictos de bosque fragmentado. El despojo territorial es el criterio socioeconómico de mayor peso con valores de 908 y 909 en El Carmen de Bolivar y San Jacinto respectivamente, y la desigualdad alcanza su máximo en Santa Marta con 0,92. Los impactos directos son moderados, pues los eventos de MAP/MUSE se concentran en El Carmen de Bolívar con 524 registros, y la aspersión con glifosato es relevante en María la Baja con el 2,8% del área asperjada. La pérdida de bosque es homogénea entre municipios, mientras que los cultivos de coca incrementan la priorización en Santa Marta y Riohacha.

Este patrón evidencia que en el Caribe el conflicto operó como un disturbio socioecológico de carácter estructural y crónico, expresado principalmente a través del despojo territorial y los cultivos de coca (Figura 8: S7)

**1.2. Escenario Chocó-Magdalena Medio**

El escenario Chocó-Magdalena Medio es el segundo más grande con 58 municipios y el que presenta la mayor coincidencia espacial entre despojo, deforestación y cuerpos en ríos del conjunto de escenarios. Se extiende desde el norte del Chocó y Antioquia, atravesando el sur de Córdoba, Bolívar y Sucre, hasta el Magdalena Medio en Santander, Boyacá y Cundinamarca. Los municipios con mayor priorización son Riosucio, Nuevo Belén de Bajirá, Cáceres, Remedios y San Luis.

Las condiciones biofísicas muestran vulnerabilidad climática media-alta en Carmen del Darién y Unguía. Predominan la combinación de agroecosistemas y ecosistemas naturales en Tierralta, Puerto Libertador, Mutatá e Ituango, y bosque fragmentado en Ituango y Dabeiba. Las condiciones socioeconómicas presentan desigualdad media a alta con un índice de GINI de 0,93 en Carepa y 0,91 en Ituango, el despojo alcanza sus valores más altos en Nuevo Belén de Bajirá con 1.112 procesos, Riosucio con 1.111 y Turbo con 1.049.

Los impactos directos se concentraron en algunos municipios del escenario. Los eventos de MAP/MUSE sobresalen en Ituango con 594, Anorí con 525 y Tarazá con 496. Los cuerpos en ríos son los más numerosos de todos los escenarios, 368 en el Magdalena, 207 en el Cauca y 17 en el Nechí. Los impactos indirectos muestran deforestación concentrada en Riosucio, Carmen del Darién y Nuevo Belén de Bajirá en el Chocó, y cultivos de coca en Ituango, Tarazá, Valdivia, Cáceres y Anorí en Antioquia, con alta coincidencia espacial entre ambos fenómenos que incrementa significativamente la priorización por impactos indirectos.

Este patrón evidencia que en el Chocó-Magdalena Medio el conflicto operó como un disturbio socioecológico de alta intensidad y múltiple expresión, combinando impactos bélicos directos con economías ilegales, cultivos legales y despojo territorial de forma simultánea y acumulativa (Figura 8: S8).

**1.3. Escenario Catatumbo-Arauca**

El escenario Catatumbo-Arauca se distingue por presentar los valores más altos de eventos de MAP/MUSE del conjunto de escenarios, con todas las categorías en niveles altos a medios. Se ubica al oriente del país en colindancia con la frontera de Venezuela, comprendiendo 19 municipios de los departamentos de Arauca y Norte de Santander, con la mayor priorización concentrada en Tibú y Tame

Las condiciones biofísicas presentan prioridad media, con transformación ecosistémica ligada principalmente a agroecosistemas y ecosistemas transicionales, aunque Tame y Fortul conservan ecosistemas naturales y los bosques fragmentados se concentran en Tibú y Sardinata. La vulnerabilidad climática es baja en todo el escenario. Las condiciones socioeconómicas muestran valores críticos de despojo con Tibú registrando 2.139 procesos de restitución de tierras, y desigualdad con un máximo de 0,84 en Tame.

Los impactos directos son los más altos del conjunto, con eventos de minas antipersona en Arauquita con 1.143, Tame con 828 y Tibú con 446. El bombardeo presenta valores bajos a medios con un máximo de siete eventos en Arauquita y cuatro en Tame. La aspersión con glifosato es baja con el 3,8% del área de Tibú asperjada. Los cuerpos en ríos se destacan en el Catatumbo con 17 registros y el Casanare con 11. Los impactos indirectos son igualmente los más altos del conjunto, con deforestación generalizada en Norte de Santander y un foco entre Tame, Puerto Rondón y Arauquita, mientras que los cultivos de coca se concentran en Tibú, El Tarra, Teorama y Sardinata.

Este patrón evidencia que en el Catatumbo-Arauca el conflicto operó como un disturbio socioecológico de alta intensidad, con impactos directos e indirectos que se expresan de forma simultánea en el territorio (Figura 8: S9)

**1.4. Escenario Amazonía-Meta**

El escenario Amazonía-Meta es el más extenso del conjunto y concentra la mayor priorización en el departamento del Putumayo, donde convergen las mayores tasas de deforestación e impactos directos del conflicto. Comprende 45 municipios de los departamentos de Caquetá, Cauca, Guaviare, Meta, Nariño y Putumayo, con todas las categorías en valores altos en la mayoría de los municipios y la priorización más alta concentrada en San Miguel, Valle del Guamuez, Orito, Leguízamo, Puerto Asís y Puerto Caicedo.

Las condiciones biofísicas se concentran principalmente en Putumayo, con vulnerabilidad climática media a alta en Leguízamo, Puerto Asís y Valle del Guamuez. Si bien predominan los agroecosistemas, hay extensas áreas de ecosistemas naturales en Leguízamo, Mocoa, San Vicente del Caguán, Miraflores y varios municipios del Meta. Los bosques fragmentados, vegetación secundaria y ecosistemas transicionales transformados se concentran en Putumayo, Piamonte, San José de Fragua, Belén de los Andaquíes y Miraflores. Las condiciones socioeconómicas muestran el despojo como criterio dominante, con valores que van desde 42 procesos en Albania hasta 2.205 en Valle del Guamuez, 1.595 en Mapiripán y 1.541 en Puerto Guzmán. La desigualdad alcanza valores máximos de 0,95 en Leguízamo y Villavicencio.

A diferencia de los demás escenarios, este presenta los mayores números de bombardeos con Puerto Gaitán con 50, La Macarena con 16 y Vistahermosa con 12. Los eventos de MAP/MUSE son igualmente elevados con Uribe registrando 1.651, Mesetas 1.000 y San Vicente del Caguán 977. Los cuerpos en ríos se destacan en el Caquetá con 8, el San Juan y el Guaviare con 7. Los impactos indirectos presentan altas tasas de deforestación, concentradas en Putumayo, Caquetá, Guaviare y Meta y cultivos de coca en San Miguel, Orito, Valle del Guamuez, Puerto Asís, Puerto Caicedo, Villagarzón e Ipiales.

Este patrón evidencia que en la Amazonía-Meta el conflicto operó como un disturbio socioecológico de alta intensidad y amplia expresión territorial, con impactos directos e indirectos que se manifiestan de forma simultánea en el departamento con mayor cobertura boscosa del país (Figura 8: S10)

**1.5. Cauca-Nariño**

El escenario Cauca-Nariño se distingue por presentar los valores más altos de desigualdad y aspersión con glifosato del conjunto de escenarios, con todas las categorías en niveles medios a altos. Comprende 18 municipios de los departamentos de Nariño y Cauca, con la mayor priorización concentrada en Tumaco, Barbacoas, Roberto Payán, Cumbitara y Policarpa en Nariño, y El Tambo y Argelia en Cauca.

Las condiciones biofísicas presentan prioridad media con vulnerabilidad climática baja en todo el escenario. La transformación ecosistémica es el criterio de mayor relevancia, con predominio de agroecosistemas entremezclados con vegetación secundaria y bosques fragmentados en Tumaco, Barbacoas, Samaniego, Cumbitara, Policarpa y los municipios del Cauca, mientras que Santa Bárbara, El Charco, Magüí y Olaya Herrera presentan ecosistemas naturales con áreas transicionales transformadas. Las condiciones socioeconómicas son las más altas del conjunto, con desigualdad crítica donde la mitad de los municipios supera 0,97 en el índice de Gini. El despojo se concentra en Tumaco con 1.882 procesos y El Tambo con 944.

Los impactos directos no registran bombardeos importantes, pero si los eventos de MAP/MUSE van desde 1.333 en Tumaco hasta 276 en Argelia y 254 en El Tambo. La aspersión con glifosato es la más alta del conjunto con el 10,2% del área de Tumaco asperjada, seguido de Magüí con 7,1%, Roberto Payán con 6,2% y El Charco con 5,2%. Los cuerpos en ríos se destacan en el Mira y el Patía con 9 registros cada uno. Los impactos indirectos siguen la misma distribución espacial de los impactos directos presentando valores medios a altos de cultivos de coca y deforestación.

Este patrón evidencia que en Nariño-Cauca el conflicto operó como un disturbio socioecológico marcado por la desigualdad estructural y el control territorial a través de economías ilegales y aspersión (Figura 8: S11)

**2. Áreas protegidas y territorios colectivos como refugios ecológicos**

Las Áreas Protegidas (AP) y los Territorios Colectivos (TC) actúan como ejes estratégicos para la restauración ecológica, promoviendo la recuperación de ecosistemas degradados, fortaleciendo su resiliencia y sosteniendo tanto la biodiversidad como las comunidades humanas. Mientras que las AP modulan principalmente criterios biofísicos y reducen impactos indirectos, los TC influyen sobre desigualdad y vulnerabilidad climática, modificando los valores de prioridad para restauración.

En Chocó-Magdalena Medio, la presencia del PNN Paramillo reduce la prioridad de restauración en municipios con altos valores de desigualdad, MAP/MUSE y cuerpos de agua, como Ituango, Tierralta y Puerto Libertador. Situaciones similares se observan en El Carmen y San Vicente de Chucurí (PNN Serranía de los Yariguíes) y Tame (PNN El Cocuy). Por su parte, los TC en Riosucio, Nuevo Belén de Bajirá y Carmen del Darién disminuyen la prioridad de impactos indirectos y desigualdad, favoreciendo la conservación de ecosistemas frente a vulnerabilidad climática y despojo. En la Amazonía-Meta, municipios como San Vicente del Caguán, Uribe, Mesetas, Vistahermosa, Puerto Rico y La Macarena presentan altos impactos por despojo y bombardeos, pero la presencia de PNN (Cordillera de los Picachos, Tinígua y Sierra de la Macarena) mantiene áreas con prioridad baja para restauración; situación similar se observa en Leguízamo con el PNN La Paya (figura 9).

Ahora bien, hay zonas donde coexiste la presencia de áreas protegidas y territorios colectivos que han resguardado los ecosistemas, y han resistido a los impactos directos e indirectos del conflicto, como en el PNN Sierra Nevada de Santa Marta en el escenario del Caribe y en PNN Catatumbo-Barí del escenario Catatumbo-Arauca, este último muy crítico por la cercanía al municipio de Tibú uno de los que se encuentra casi en su totalidad con niveles altos de prioridad. No obstante, en Nariño-Cauca, municipios como Tumaco, Roberto Payán, Barbacoas, Policarpa, Cumbitara y Samaniego presentan amplios solapes con TC, pero persisten altos impactos directos e indirectos (MAP/MUSE, coca, deforestación, aspersión con glifosato) y desigualdad.

**3. Coherencia espacial con regiones PDET**

En general, se observa una coherencia espacial importante entre los escenarios priorizados y las regiones PDET. Esta coincidencia es total en el escenario Cauca-Nariño y muy alta en Catatumbo-Arauca, donde las áreas priorizadas se superponen en gran medida con los límites PDET. En el escenario Chocó-Magdalena Medio, la correspondencia solamente no coincide en algunos municipios del Magdalena Medio que fueron priorizados con el HFIS. En el Caribe, la coincidencia también es parcial, destacando que solo Riohacha no se observa superposición con las áreas priorizadas. En la Amazonía-Meta, aunque la mayoría de las áreas priorizadas se alinean con las regiones PDET, se identifican municipios como Villavicencio, Acacías, Puerto Gaitán y San Martín donde no hay coincidencia.

**DISCUSIÓN**

La selección de criterios y el diseño de los FIS son coherentes con aplicaciones previas de lógica difusa en problemas de sostenibilidad con múltiples factores interconectados y sin límites claramente definidos (Ducey & Larson, 1999). El uso de funciones triangulares y trapezoidales permitió representar la subjetividad inherente a cada criterio e incorporar conocimiento experto explícitamente, en concordancia con Ocampo-Melgar et al. (2016) y Kuzminov et al. (2020), y en contraste con estudios que emplearon funciones de curva sinuosa (Mejía Aguilar, 2021) o tipo campana (Nebot & Mugica, 2021). A diferencia de aproximaciones que reducen la interferencia del investigador mediante valores máximos, promedio y mínimos sin pesos específicos (Dos Santos et al., 2020), los intervalos y pesos se definieron a partir de literatura especializada e informes estatales, en línea con estudios que reconocen el papel del conocimiento experto en la construcción del modelo difuso (Lourenço et al., 2015). Este enfoque representa además un aporte metodológico en sí mismo, dado que el potencial de la lógica difusa para evaluar y priorizar acciones de RE ha sido poco explorado (Ocampo-Melgar et al., 2016), y los valores jerarquizados y graduales que produce permiten enfocar mejor los recursos de proyectos de RE en acciones posconflicto que se encuentran en fases iniciales (JEP, 2024), en línea con lo propuesto por Méndez-Toribio et al. (2017).

La exclusión del costo como criterio de priorización puede resultar favorable en términos estratégicos (Andres et al., 2024), dado que muchas de las áreas priorizadas carecen de servicios básicos, vías, acceso a insumos y claridad sobre la tenencia de la tierra como consecuencia del abandono estatal (Rodríguez, 2021), condiciones que en muchos casos fueron generadoras de las dinámicas de conflicto y control territorial por grupos armados (CNMH, 2014). Esta decisión se distancia de ejercicios de priorización nacional que incorporan el costo-beneficio como criterio, como el del Instituto Alexander von Humboldt (Issacs-Cubides et al., 2021).

**El conflicto como disturbio socioecológico**

El mapa de priorización obtenido difiere del de la Estrategia Nacional de Restauración del MADS (2023) porque parten de marcos conceptuales distintos: mientras la ENR no incorpora el conflicto armado como impulsor de la pérdida de biodiversidad (MADS, 2024), este modelo se fundamenta en que el conflicto ha operado como un disturbio socioecológico que reconfigura los patrones territoriales de prioridad, en línea con Castro-Núñez et al. (2017). La inclusión explícita del conflicto como disturbio aplicado al modelo conceptual de Salafsky et al. (2002) permitió generar escenarios que la ENR no captura. Esta distinción tiene implicaciones prácticas relevantes: desconocer el conflicto como disturbio puede conducir a proyectos de RE insostenibles (Olowonihi & Osazuwa, 2024) y a un uso ineficiente de recursos públicos (Aguilar-Garavito et al., 2025), debido a lecturas incompletas del territorio que omiten el conflicto como factor central en las reconfiguraciones socioespaciales (Ojeda, 2016). Los resultados refuerzan así que la recuperación de recursos naturales en contextos posconflicto no puede ser efectiva sin abordar los factores estructurales que originaron la violencia (Olowonihi & Osazuwa, 2024).

Los escenarios obtenidos muestran una alta correspondencia con las subregiones priorizadas por Colombia para los Programas de Desarrollo con Enfoque Territorial (PDET), orientados a los territorios más afectados por la violencia. Este resultado es especialmente significativo porque, aunque los PDET se definieron a partir de criterios sociales y políticos —pobreza, impacto del conflicto, debilidad institucional y economías ilegales (República de Colombia, 2017a), el modelo aquí propuesto incorpora además variables biofísicas, logrando aun así patrones espaciales similares. Esto indica que el modelo no solo reproduce priorizaciones institucionales, sino que las sustenta desde una lectura socioecológica más amplia**.**

En este sentido, los resultados respaldan empíricamente la idea de que el conflicto armado en Colombia ha operado también como un factor de degradación ambiental, coherente con lo planteado por Sánchez-Cuervo y Aide (2013) donde evidenciaron que se generaron cambios en la cobertura forestal asociados al conflicto, y con Le Billon (2001) que plateo que existe un vínculo entre guerra y extracción intensiva de recursos. Así, un aporte de este trabajo es mostrar, a partir de un modelo integrador, que la priorización territorial en contextos de conflicto no puede separarse de los procesos de degradación ambiental que la guerra ha contribuido a producir.

**Las áreas protegidas y territorios colectivos claves para las estrategias RE en el posconflicto**

Los escenarios de priorización son coherentes con la asociación negativa entre las AP y la deforestación en Colombia (Negret, 2020). Estos territorios no solo actúan como barreras frente a la pérdida de bosque, sino que tienen alto potencial para resistir las causas estructurales del conflicto, contribuir al almacenamiento de carbono y proteger zonas de alta biodiversidad (Molina-Parra et al., 2025). Sin embargo, las AP dentro de los escenarios priorizados registran un alto número de eventos de MAP/MUSE (Anexo X), lo que hace necesario evaluar si existe una relación entre las restricciones de acceso a estos territorios y las limitaciones para la transformación ecosistémica.

No hay que perder de vista que, así como el conflicto generó degradación ambiental en muchos territorios, en otros favoreció la conservación, ejemplo de ello es el desplazamiento forzado y el abandono de tierras favorecieron la regeneración en el Chocó-Darién y Magdalena-Urabá (Sánchez-Cuervo & Aide, 2013), y en la Serranía de la Macarena el conflicto mantuvo estas áreas fuera del alcance del desarrollo (Negret, 2020). Este patrón es especialmente relevante en el contexto actual, pues el aumento de la deforestación registrado tras el Acuerdo de Paz en estas mismas áreas (Clerici et al., 2020) evidencia que esa protección es frágil y transitoria, lo que refuerza la urgencia de consolidar estos territorios mediante acciones de RE. En consecuencia, las zonas de amortiguación y los corredores de conectividad entre áreas protegidas constituyen espacios estratégicos prioritarios, especialmente en escenarios donde el desminado humanitario es condición previa de acceso.

De forma similar, los TC de grupos étnicos tienden a presentar menores tasas de deforestación frente a otras formas de tenencia (Negret, 2020), coincidiendo con Vélez et al. (2020), quienes evidenciaron que la titulación colectiva en comunidades afrodescendientes del Pacífico ha contribuido significativamente a frenar la pérdida de bosque al fortalecer las reglas comunitarias de uso del territorio. Sin embargo, esto no es una regla, en el escenario Cauca-Nariño a pesar de que se presenta un gran solapamiento con TC registra valores altos de prioridad, consistente con las barreras significativas que enfrentan pueblos indígenas y afrodescendientes para recuperar efectivamente sus territorios debido a burocracia, violencia y priorización de intereses económicos (Park & Hunter-Pazár, 2025). Las estrategias de RE en estos territorios requieren una fuerte articulación con los grupos étnicos.

En algunas zonas donde coexisten AP y TC, como el PNN Sierra Nevada de Santa Marta en el escenario Caribe y el PNN Catatumbo-Barí en el escenario Catatumbo-Arauca, los socioecosistemas han resistido los impactos del conflicto con niveles bajos de priorización. Por lo que esto los hace esenciales en la planificación de acciones de RE a gran escala con enfoque de paisaje (Janishevski et al., 2015), aunque su fortalecimiento requiere enfoques diferenciados de gobernanza según el contexto de cada escenario (Wiegant et al., 2022).

**Estrategias diferenciadas de RE por escenario**

Si bien el desminado humanitario es una consideración crítica transversal a los cinco escenarios, esto no debe postergar las acciones de RE sino avanzar de forma articulada con ellas, tomando como nodos de partida las áreas protegidas y territorios colectivos que concentran menor degradación y mayor potencial de conectividad ecológica. La Tabla 3 sintetiza las estrategias y consideraciones críticas por escenario.

La heterogeneidad de los disturbios socioecológicos identificada en los escenarios, incluso al interior de cada uno de ellos, determina que las estrategias de RE deban ser profundamente territorializadas. Si bien los escenarios coinciden con territorios previamente identificados como prioritarios por su vulnerabilidad climática e impactos del conflicto (Aguilar-Garavito & Ramírez, 2017), la priorización en cada uno responde a dinámicas diferenciales que exigen estrategias flexibles capaces de recuperar simultáneamente la resiliencia ecológica y la funcionalidad de los sistemas humanos y naturales (IUFRO, 2025).

En el escenario Amazonía-Meta se evidencian patrones diferenciados de violencia y degradación ambiental, municipios como Puerto Gaitán, La Macarena y Vistahermosa concentran los bombardeos, mientras que Tarazá y Valle del Guamuez registran mayor aspersión con glifosato. En Putumayo y parte de Guaviare y Meta la deforestación coincide con cultivos de coca, mientras que en San Vicente del Caguán y San José del Guaviare responde a economías extractivas y expansión agropecuaria. En estos contextos la RE debe combinar acciones para negociar con economías ilegales y recuperar la integridad ecológica, articulándose con iniciativas de formalización minera (Ministerio de Minas y Energía, 2023) y modelos como el propuesto por Villa (2014), especialmente en regiones como Caribe y Amazonía-Meta que conservan amplias áreas naturales.

Un aspecto crítico es que algunos escenarios son priorizados por la presencia de cultivos de coca en territorios colectivos o resguardos indígenas, como en Riohacha y Santa Marta. En estos casos es necesario reconocer que el cultivo de coca es legal cuando se enmarca en usos tradicionales y espirituales de los pueblos indígenas (Corte Constitucional, 2018), por lo que las acciones de RE deben articularse con otros actores de la gestión territorial y orientarse principalmente a mejorar las condiciones socioeconómicas y territoriales, más que a intervenir directamente los agroecosistemas.

En los escenarios Catatumbo-Arauca y Nariño-Cauca, y particularmente en Putumayo dentro del escenario Amazonía-Meta, la deforestación coincide con cultivos de coca, altas concentraciones de MAP/MUSE, aspersión con glifosato, despojo y desigualdad. Estos territorios demandan fuerte articulación institucional y comunitaria para manejar los múltiples tensionantes del conflicto, incluyendo el avance del desminado humanitario, pues aún existen municipios priorizados sin intervención dentro del programa nacional (AICMA, 2025) y la consolidación de alternativas a las economías ilegales impulsadas por el PNIS (República de Colombia, 2017b), considerando que en algunos procesos de sustitución no se han logrado transformaciones socioeconómicas significativas (Miguel-López & Alba-Maldonado, 2024), fortaleciendo la gobernanza con figuras de organización campesina.

La RE en territorios afectados por el conflicto armado debe incorporar la participación de las comunidades víctimas en todas sus fases y articularse con las políticas de reparación, restitución de tierras y garantías de no repetición. Entender la restauración como un proceso simultáneamente biofísico, social y simbólico de reconstrucción territorial es condición para su sostenibilidad a largo plazo.

Finalmente, los escenarios propuestos deben entenderse como orientadores y no prescriptivos, dado que el conflicto sigue siendo dinámico y exige refinamiento en la escala de análisis y lectura contextual permanente. Los municipios con mayor grado de prioridad continúan enfrentando conflictividades que desbordan las dinámicas históricas analizadas, imponiendo mayores restricciones para la implementación de proyectos de RE — tal es el caso de Tibú, Barbacoas, Tumaco, Roberto Payán y el departamento del Putumayo, donde la prioridad identificada es alarmante y las tensiones de la guerra persisten (Consejo Danés para Refugiados, 2025; Defensoría del Pueblo, 2025; Human Rights Watch, 2025; Amazon Frontlines, 2023).

**LIMITACIONES**

La priorización a escala nacional permitió identificar áreas coherentes con otras priorizaciones institucionales como los PDET, pero las escalas amplias tienden a homogenizar información territorial (Levin, 1992). Si bien la deforestación se ha usado como indicador de los impactos de la guerra sobre los ecosistemas (Castro-Núñez et al., 2017; Dorondel et al., 2021; Ghosh & Ramesh, 2023), la información de bosque/no bosque disponible para Colombia es un criterio general que no permite identificar áreas que perdieron cobertura específicamente por factores asociados al conflicto, como sí lo evidenció Negret (2020). Asociar los fenómenos de deforestación a otras economías ilegales y legales más allá de los cultivos de coca requeriría un ejercicio más minucioso, dado que estas dinámicas son difíciles de rastrear espacialmente (Duque et al., 2023; International Crisis Group, 2021).

Un fenómeno relacionado con la escala es el comportamiento homogéneo de los criterios biofísicos en casi todos los municipios, lo que puede deberse a la definición de los intervalos de las funciones de membresía o a la dificultad de vincular criterios ecológicos con dinámicas del conflicto a escala nacional. A escalas menores este vínculo puede ser más preciso (Armenteras et al., 2013, 2019). El modelo no fue sometido a validación empírica de campo, limitación que la coincidencia espacial con los PDET suple solo parcialmente. Finalmente, la incorporación de variables culturales, de gobernanza comunitaria y de percepción territorial, constituye una línea prioritaria de desarrollo, que la flexibilidad de la lógica difusa permitiría integrar en versiones futuras del modelo sin incrementar sustancialmente su complejidad.

**CONCLUSIONES**

Este trabajo permitió definir un conjunto de criterios socioecológicos que reconocen al CAI no como un factor externo sino como un disturbio histórico y constitutivo del paisaje colombiano. La lógica difusa demostró ser adecuada para integrar información heterogénea proveniente de distintas fuentes y períodos, permitiendo trabajar con incertidumbre, gradientes y conocimiento experto en un contexto donde los límites entre variables son inherentemente difusos. La inclusión de criterios de impactos directos e indirectos del conflicto mostró que, aun cuando algunos no afectan gravemente la estructura y función de los ecosistemas, sí transforman profundamente la relación de las personas con sus territorios, lo que refuerza que la degradación ambiental en Colombia está estrechamente ligada a las trayectorias del CAI y a sus expresiones sociales y territoriales.

La aplicación del modelo identificó cinco escenarios prioritarios a escala nacional donde convergen transformación ecosistémica, deforestación y distintos impactos del conflicto, varios de los cuales coinciden con zonas ya priorizadas por el Estado para inversión pública en territorios afectados por la violencia, sugiriendo una relación estructural entre degradación ambiental y dinámicas del conflicto. El modelo evidenció que la priorización no depende solo de variables biofísicas sino de cómo se integran dimensiones sociales, históricas y de violencia en las reglas de inferencia, mostrando que los territorios afectados por el conflicto requieren lecturas diferenciales similares a las que se realizan frente a otros tipos de disturbios. El mapa nacional no constituye una receta única sino una herramienta orientadora que debe leerse siempre desde el contexto local y las trayectorias específicas de cada territorio.

La RE en territorios atravesados por el CAI puede aportar a los procesos de reparación siempre que se conciba como un proceso colectivo, participativo y adaptativo que trascienda la recuperación biofísica e incorpore dimensiones sociales, culturales y territoriales. Para lograrlo, futuras investigaciones deberían incorporar variables de gobernanza comunitaria y percepción territorial, dimensiones que la flexibilidad de la lógica difusa permitiría integrar sin incrementar sustancialmente la complejidad del modelo y avanzar hacia ejercicios de validación participativa con comunidades que otorguen legitimidad local a las priorizaciones. Solo así la restauración puede contribuir a sanar no solo los ecosistemas sino también las relaciones entre las personas y sus territorios.
